# Supplementary figures and images for: Disulfiram/Copper Induces Immunogenic Cell Death and Enhances CD47 Blockade in Hepatocellular Carcinoma
Source: MDPI journal article supplement (doi:10.3390/cancers14194715), 2022-09-28

**Figure 3C**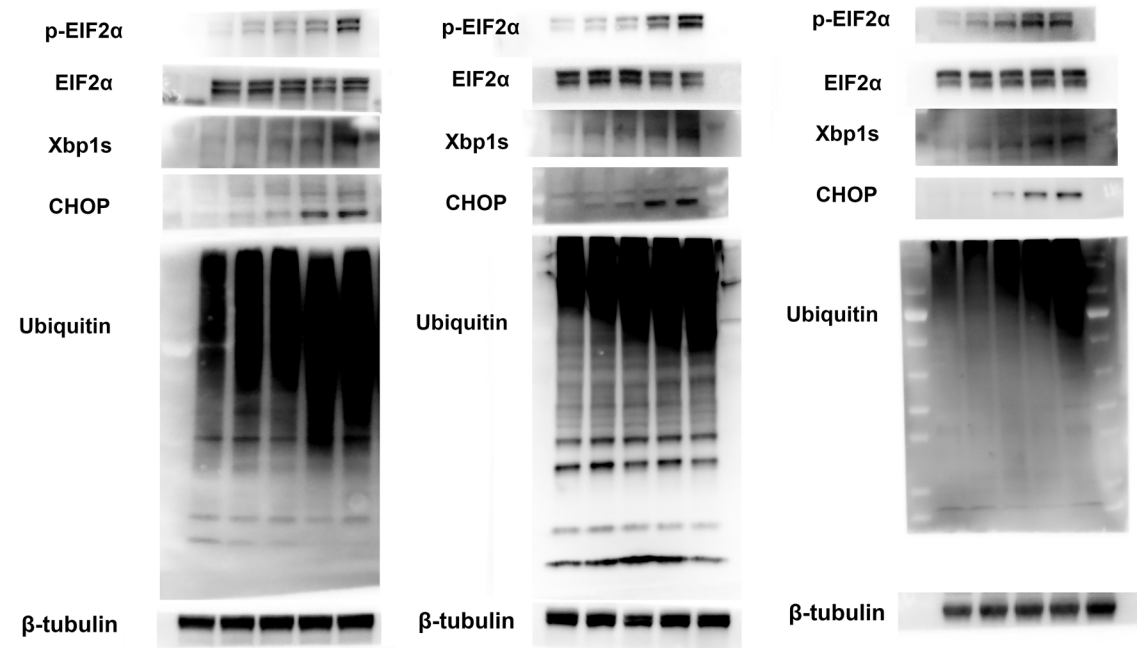**Figure 3E**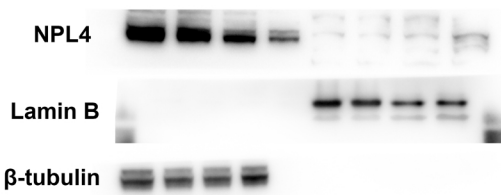**Figure 4A**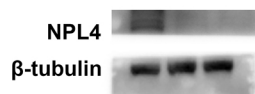**Figure 4I**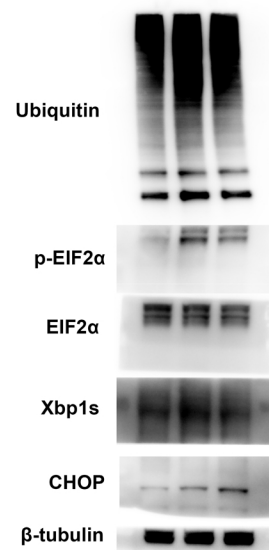

Supplement: s1 [file s1]
